# Supplementary material
Source: publisher figshare collection journal article supplement (https://gsapubs.figshare.com/articles/dataset/_/16435215)
Supplement: Supplementary file 1 [file 1]

Tang, L., Wagner, T., Fusswinkel, T., Zhang, S.-T., Hu, X.-K., and Schlegel, T.U., 2021, Fluid inclusion evidence for the magmatic-hydrothermal evolution of closely linked porphyry Au, porphyry Mo, and barren systems, East Qinling, China: GSA Bulletin, <https://doi.org/10.1130/B36170.1>.

## Supplemental Material

**Table S1.** List of studied samples from the Qiyugou Au deposit, Leimengou Mo deposit and Huashan barren pluton.

**Table S2.** Petrography and microthermometry data of fluid inclusion assemblages.

**Table S3.** Average elemental concentrations ( $\mu\text{g/g}$ ) of fluid inclusion assemblages.

Table S1 List of studied samples from the Qiyugou Au deposit, Leimengou Mo deposit and Huashan barren pluton.

| Location  | Sample | Brief description                                                                                                      | P | M | LA |
|-----------|--------|------------------------------------------------------------------------------------------------------------------------|---|---|----|
| Qiyugou   | 19Q-01 | Fine-grained PG, weak phyllic alteration, 15 m (from the southern margin) at 220 m level                               | √ |   |    |
|           | 19Q-02 | Fine-grained PG, crosscut by pyrite vein which is poor in quartz, 40 m at 220 m level                                  | √ |   |    |
|           | 19Q-03 | Fine-grained PG with disseminated pyrite, phyllic alteration, 80 m at 220 m level                                      | √ |   |    |
|           | 19Q-04 | Fine-grained PG with disseminated pyrite, 110 m at 220 m level                                                         | √ |   |    |
|           | 19Q-05 | Fine-grained PG, thin vein with abundant pyrite and minor quartz, 140 m at 220 m level                                 | √ |   |    |
|           | 19Q-06 | Pyrite-quartz veins cut the potassic altered PG, the veins have open cavities, 170 m at 220 m level                    | √ |   |    |
|           | 19Q-07 | Strongly potassic alteration and silicification, pyrite occurs along the boundary or in the vein, 175 m at 220 m level | √ |   |    |
|           | 19Q-08 | Milky pyrite + quartz vein that crosscuts the pinkish PG, disseminated pyrite is abundant, 190 m at 220 m level        | √ | √ | √  |
|           | 19Q-09 | Massive ore with weak potassic alteration, crosscut by pyrite-quartz vein, 195 m at 220 m level                        | √ |   |    |
|           | 19Q-10 | Pyrite + quartz vein in PG, abundant medium-grained pyrite as aggregates, 180 m at 220 m level                         | √ |   |    |
|           | 19Q-11 | Massive PG with pinkish color and disseminated pyrite, strongly potassic altered, 180 m at 220 m level                 | √ |   |    |
|           | 19Q-12 | Massive ore with potassic-altered PG and pyrite + quartz vein, 200m at 220 m level                                     | √ |   |    |
|           | QYG-10 | Fine-grained PG, pyrite is more abundant in the phyllic-altered domain, at 280 level                                   | √ |   |    |
|           | QYG-11 | Potassic-altered PG with disseminated pyrite, at 280 m level                                                           | √ | √ | √  |
|           | QYG-12 | Pyrite + quartz vein crosscut quartz + pyrite + molybdenite vein, host rock is PG, at 280 m level                      | √ | √ | √  |
|           | QYG-13 | Thin vein of quartz + pyrite + molybdenite that cuts the fine-grained PG, at 280 m level                               | √ | √ | √  |
|           | QYG-14 | Milky quartz vein that cuts potassic-altered PG, open cavities in the vein, at 280 m level                             | √ |   |    |
|           | QYG-15 | Milky quartz + pyrite vein that cuts the PG, disseminated pyrite in the vein and in the PG, at 280 m level             | √ |   |    |
|           | QYG-16 | Massive ore with strong potassic alteration, PG crosscut by pyrite-quartz vein, at 280 m level                         | √ |   |    |
| Leimengou | QYG-17 | Milky quartz with open cavity that cuts fine-grained PG, at 280 m level                                                | √ |   |    |
|           | QYG-18 | Milky quartz with open cavity in host rock PG, at 280 m level                                                          | √ |   |    |
|           | QYG-19 | Coarse-grained pyrite + quartz vein that cuts pinkish PG, pyrite occurs in aggregates, at 280 m                        | √ |   |    |
|           | LMG-01 | Quartz + molybdenite + pyrite ± chalcopyrite veinlets, crosscut the potassic-altered GP                                | √ | √ | √  |
|           | LMG-02 | Milky quartz + pyrite ± molybdenite veins that crosscut GP, minor molybdenite distributed along the vein margin        | √ |   |    |

|         |         |                                                                                                                                                           |   |   |   |
|---------|---------|-----------------------------------------------------------------------------------------------------------------------------------------------------------|---|---|---|
|         | LMG-03  | Milky quartz + pyrite $\pm$ molybdenite veins that crosscut GP, abundant molybdenite in the vein                                                          | √ |   |   |
|         | LMG-04  | Coarse-grained fluorite + calcite + quartz vein with open cavity                                                                                          | √ |   |   |
|         | LMG-05  | Weakly-altered GP with disseminated pyrite, crosscut by K-feldspar + quartz + molybdenite vein                                                            | √ |   |   |
|         | LMG-06  | Milky quartz vein with minor pyrite in the vein and molybdenite along the margin that crosscuts K-altered GP                                              | √ |   |   |
|         | LMG-07  | Quartz + pyrite vein and quartz + molybdenite + pyrite vein that crosscut each other, host rock is GP                                                     | √ |   |   |
|         | LMG-08  | Quartz + pyrite vein crosscut by quartz + molybdenite + pyrite vein, the host GP contains disseminated pyrite                                             | √ |   |   |
|         | LMG-09  | Strongly potassic-altered GP, crosscut by quartz + pyrite vein which contains no molybdenite                                                              | √ |   |   |
|         | LMG-10  | K-feldspar + quartz + molybdenite vein that crosscuts the GP which contains disseminated pyrite                                                           | √ | √ | √ |
|         | LMG-12  | Barren GP, coarse K-feldspar constitutes the major phenocryst, no visible sulfide in hand-specimen                                                        | √ |   |   |
|         | LMG-13  | Barren GP, coarse K-feldspar constitutes the major phenocryst, no visible sulfide in hand-specimen                                                        | √ |   |   |
|         | LMG-14  | Barren GP with abundant disseminated pyrite                                                                                                               | √ |   |   |
|         | LMG-15  | Quartz + molybdenite + pyrite vein that crosscuts the PG, the core of the vein is dominantly barren quartz, molybdenite and pyrite occur along the margin | √ |   |   |
|         | LMG-16  | Quartz + molybdenite + pyrite vein that crosscuts the PG with open cavity, molybdenite occurs along the margin                                            | √ |   |   |
|         | LMG-17  | Massive potassic-altered GP with disseminated pyrite, crosscut by thin quartz + molybdenite vein                                                          | √ |   |   |
|         | LMG-18  | Strongly potassic-altered GP with open cavity, crosscut by thin quartz + molybdenite vein                                                                 | √ |   |   |
|         | LMG-19  | Massive GP with open cavity, molybdenite occurs as disseminated aggregates in the porphyry                                                                | √ |   |   |
|         | LMG-20  | Quartz + fluorite (light blue and colorless) vein that crosscuts the GP                                                                                   | √ | √ | √ |
| Huashan | 19HS-01 | Porphyritic biotite monzonite, phenocrysts: K-feldspar, plagioclase, quartz, biotite                                                                      | √ |   |   |
|         | 19HS-02 | Porphyritic monzonitic granite, phenocrysts: K-feldspar, plagioclase, quartz                                                                              | √ | √ |   |
|         | HS-01   | Porphyritic biotite monzonite, phenocrysts: K-feldspar, plagioclase, quartz, biotite                                                                      | √ | √ |   |
|         | HS-02   | Porphyritic biotite monzonite, phenocrysts: K-feldspar, plagioclase, quartz, biotite                                                                      | √ | √ | √ |
|         | JSM-01  | Porphyritic biotite granite, phenocrysts: plagioclase, quartz, biotite                                                                                    | √ |   |   |
|         | JSM-02  | Porphyritic biotite granite, phenocrysts: plagioclase, quartz, biotite                                                                                    | √ | √ | √ |

Abbreviations: PG, porphyritic granite; GP, granite porphyry; P, petrography; M, Microthermometry; LA, laser ablation-inductively coupled plasma-mass spectrometry.
